# Supplementary material for: The Triterpenoid CDDO-Methyl Ester Redirects Macrophage Polarization and Reduces Lung Tumor Burden in a Nrf2-Dependent Manner
Source: MDPI journal article supplement (doi:10.3390/antiox12010116), 2023-01-03
Supplement: s1 [file s1]

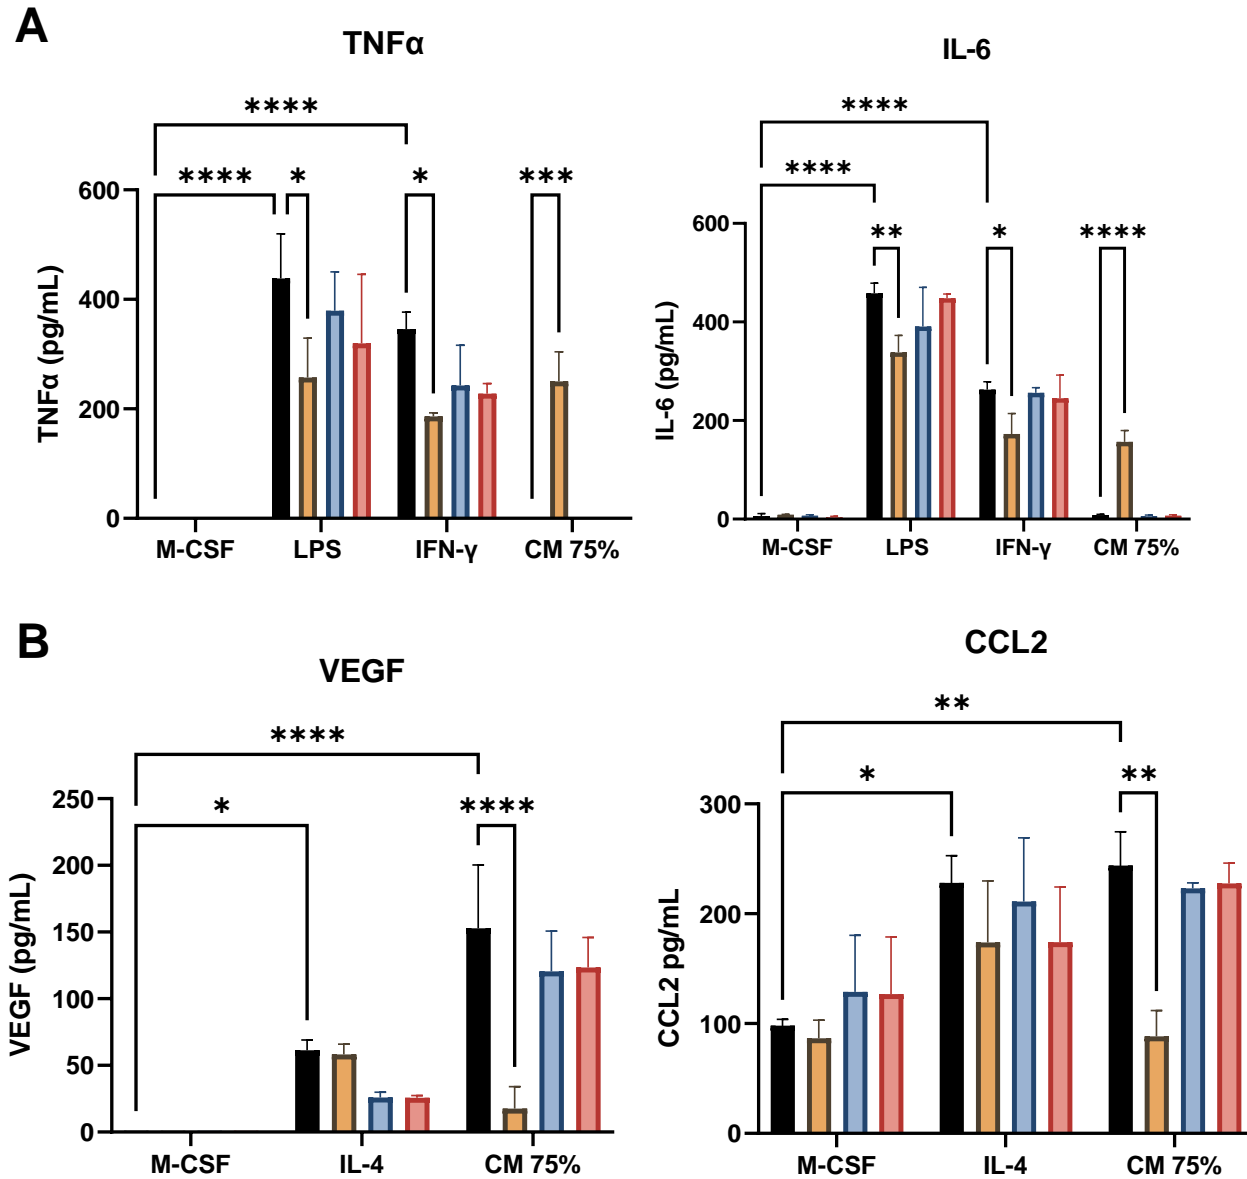

**Supplemental Figure S1: CDDO-Me has opposing Nrf2-dependent effects on protein expression in BMDMs stimulated with LPS or IFN $\gamma$  vs. conditioned media from LL2 lung cancer cells.**

Bone marrow-derived monocytes were isolated from A/J WT and Nrf2 KO mice and differentiated with M-CSF for 5 days. Cells were stimulated with 10 ng/mL LPS or 10 ng/mL IFN- $\gamma$  to induce a M1 (**A**) phenotype, 10 ng/mL IL-4 to induce a M2 (**B**) phenotype, or conditioned media (CM) from LL2 lung cancer cells to induce a tumor-educated phenotype. BMDMs were then treated with vehicle or 100 nM CDDO-Me for 24 hours and secreted protein expression was analyzed by ELISAs. Two-way ANOVA followed by Tukey HSD. \*  $p < 0.05$ ; \*\*  $p < 0.01$ ; \*\*\*  $p < 0.001$ ; \*\*\*\*  $p < 0.0001$

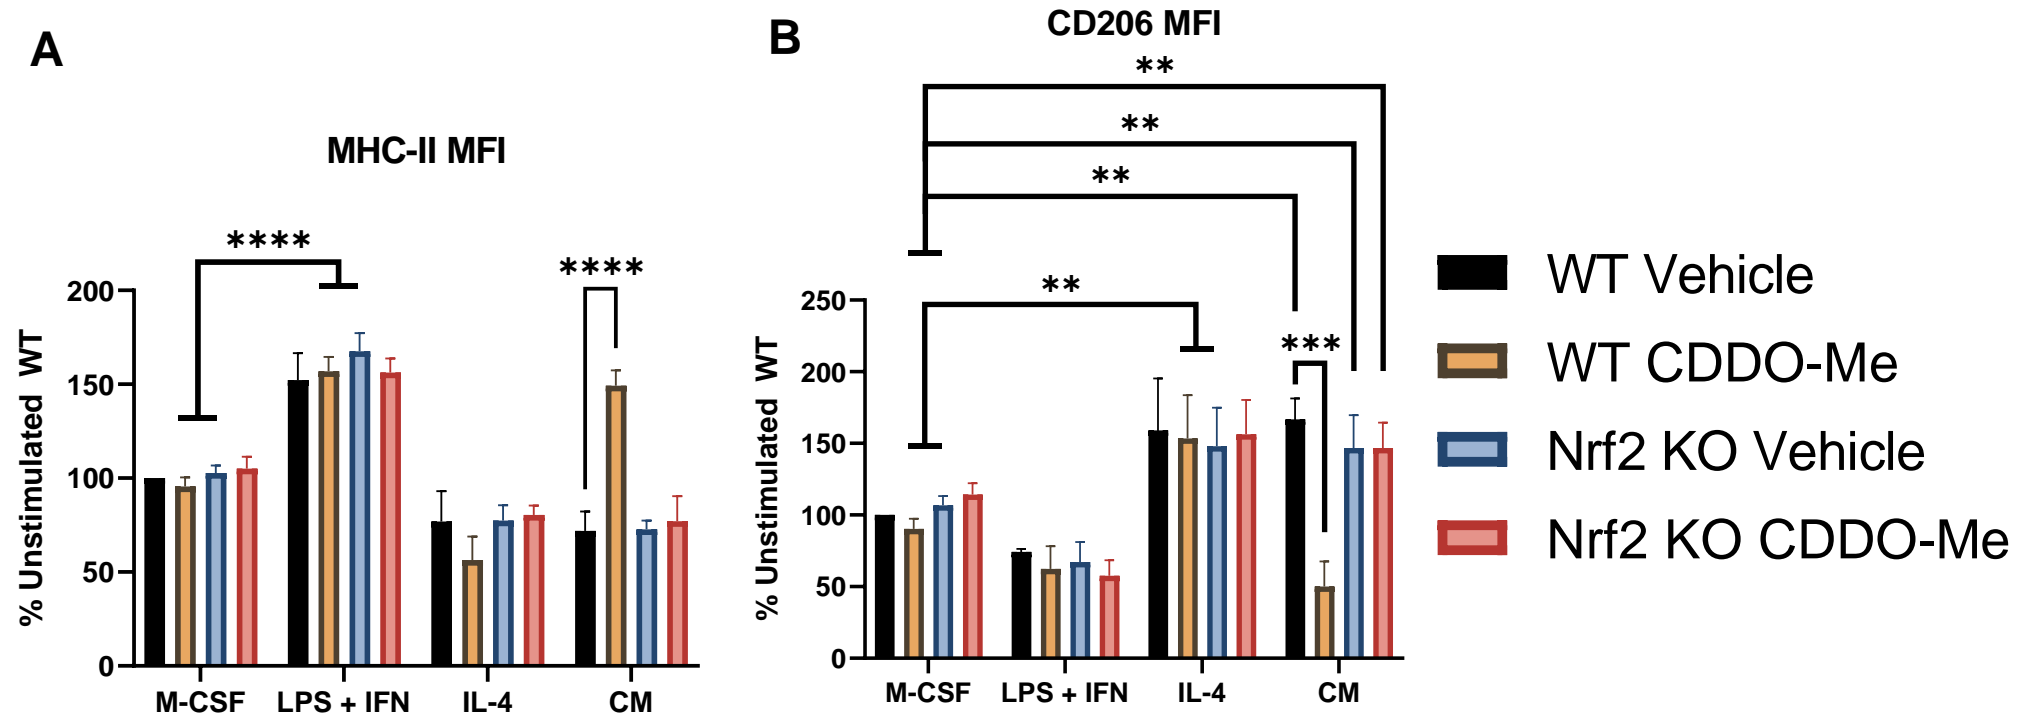

**Supplemental Figure S2: CDDO-Me changes phenotypic surface marker expression on tumor-educated BMDMs in a Nrf2-dependent manner.** BMDMs were isolated as described in Supp. Fig. 1 and treated with 100 nM CDDO-Me for 48 hrs. Surface marker expression was analyzed by flow cytometry. Mean fluorescence intensity (MFI) of MHC-II (**A**) and CD206 (**B**). Two-way ANOVA followed by Tukey HSD. \*\*  $p < 0.01$ ; \*\*\*  $p < 0.001$ ; \*\*\*\*  $p < 0.0001$

**A**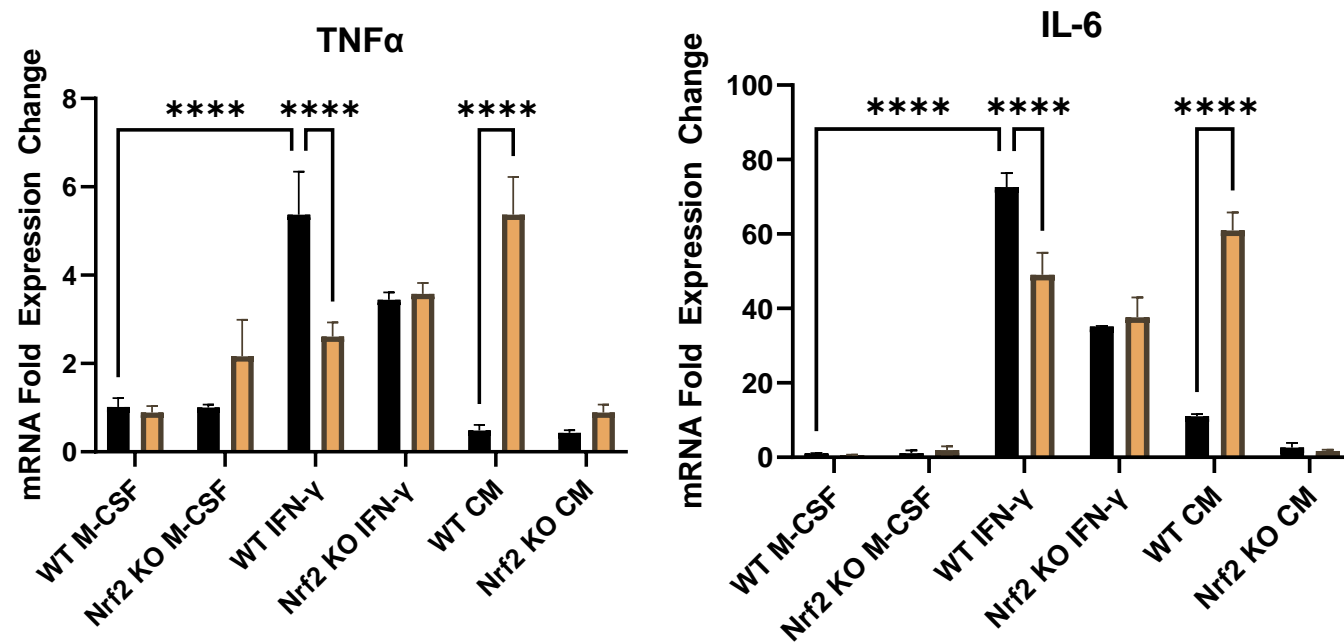**B**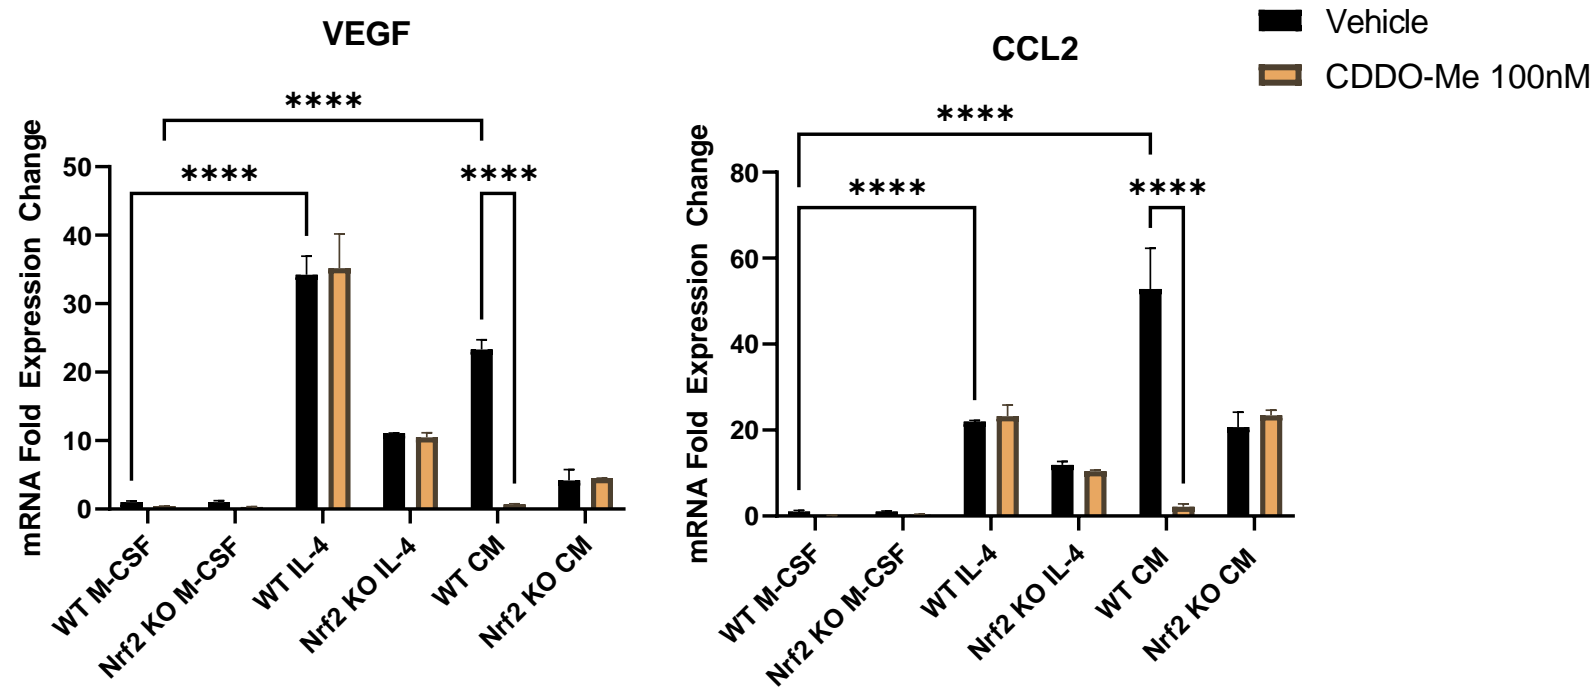

**Supplemental Figure S3: CDDO-Me has opposing Nrf2-dependent effects in BMDMs stimulated with LPS or IFN $\gamma$  vs. conditioned media from VC-1 lung cancer cells.** Bone marrow-derived monocytes were isolated from A/J WT and Nrf2 KO mice and differentiated with M-CSF for 5 days. Bone marrow-derived macrophages were stimulated with 10 ng/mL LPS or 10 ng/mL IFN- $\gamma$  to induce a M1 (**A**) phenotype, 10 ng/mL IL-4 to induce a M2 (**B**) phenotype, or conditioned media (CM) from VC-1 lung cancer cells to induce a tumor-educated (**A**, **B**) phenotype. BMDMs were then treated with vehicle (black bars) or 100 nM CDDO-Me (orange bars) for 24 hours and mRNA expression was analyzed by qPCR. Two-way ANOVA followed by Tukey HSD. \*\*\*\* p < 0.0001.

| Target       | Source | Forward                       | Reverse                        |
|--------------|--------|-------------------------------|--------------------------------|
| GAPDH        | IDT    | 5'-CATCACTGCCACCCAGAAGACTG-3' | 5'-ATGCCAGTGAGCTTCCCGTTCAG-3'  |
| TNF $\alpha$ | IDT    | 5'-AAGCCTGTAGCCCACGTCGTA-3'   | 5'-GGCACCAGTAGTTGGTTGTCTTTG-3' |
| IL-6         | IDT    | 5'-CACGGCCCTCCCTACTTCAC-3'    | 5'-TGCAAGTGCATCATCGGTGT-3'     |
| VEGF         | IDT    | 5'-CTCACCAAAGCCAGCACATA-3'    | 5'-AATGCTTTCTCCGCTCTGAA-3'     |
| NQO1         | IDT    | 5'-AATGGGCCAGTACAATCAGG-3'    | 5'-CCAGCCCTAAGGATCTCTCC-3'     |
| HO-1         | IDT    | 5'-CCTTCCCGAACATCGACAGCC-3'   | 5'-GCAGCTCCTCAAACAGCTCAA-3'    |
| Target       | Source | Catalog #                     |                                |
| CCL2         | Qiagen | PPM03151G-200                 |                                |

**Supplemental Table S1: Primer sequences used in qPCR experiments.**

|                                | <b>Male</b> | <b>Female</b> |
|--------------------------------|-------------|---------------|
| <b>WT Vehicle</b>              | 27.4 ± 1.2  | 21.9 ± 0.9    |
| <b>WT CDDO-Me 50mg/kg</b>      | 25.9 ± 0.9  | 19.9 ± 0.9    |
| <b>Nrf2 KO Vehicle</b>         | 25.9 ± 0.5  | 21.4 ± 0.5    |
| <b>Nrf2 KO CDDO-Me 50mg/kg</b> | 25.8 ± 0.4  | 21.2 ± 0.6    |

**Supplemental Table S2: Final weights of WT and Nrf2 KO A/J mice. Average weight (g) ± standard error.**

|                                                          | F WT Control             | M WT Control                         | F WT Me                   | M WT Me                              |
|----------------------------------------------------------|--------------------------|--------------------------------------|---------------------------|--------------------------------------|
| <b>Surface tumors</b>                                    | <b>321</b>               | <b>297</b>                           | <b>47</b>                 | <b>59</b>                            |
| Mice per group                                           | <b>12</b>                | <b>11</b>                            | <b>12</b>                 | <b>12</b>                            |
| Avg # tumors per mouse (% WT control)                    | <b>26.8±3.0 (100%)</b>   | <b>27±1.8 (100%)</b>                 | <b>3.9±0.6 (14.6%)</b>    | <b>4.9±0.8 (18.2%)</b>               |
| <b>Tumor number size &amp; burden</b>                    |                          |                                      |                           |                                      |
| Avg # tumors/slide (% WT control)                        | <b>2.96±0.4 (100%)</b>   | <b>2.05±0.3 (100%)</b>               | <b>0.63±0.1 (21.3%)</b>   | <b>1.29±0.3 (63.1%)* vs. F WT Me</b> |
| Avg tumor size (mm <sup>3</sup> )/slide (% WT control)   | <b>0.21±0.08 (100%)</b>  | <b>0.33±0.1 (100%)</b>               | <b>0.02±0.005 (11.7%)</b> | <b>0.04±0.01 (10.9%)</b>             |
| Avg tumor burden (mm <sup>3</sup> )/slide (% WT control) | <b>0.61±0.1 (100%)</b>   | <b>0.68±0.2 (100%)</b>               | <b>0.02±0.004 (2.51%)</b> | <b>0.05±0.01 (6.9%)* vs. F WT Me</b> |
| <b>Tumor histopathology</b>                              |                          |                                      |                           |                                      |
| Total # low grade (% total)                              | <b>19 (27%)</b>          | <b>5 (11%)</b>                       | <b>7 (47%)</b>            | <b>14 (45%)</b>                      |
| Total # medium grade (% total)                           | <b>28 (39%)</b>          | <b>16 (36%)</b>                      | <b>5 (33%)</b>            | <b>12 (39%)</b>                      |
| Total # high grade (% total)                             | <b>24 (34%)</b>          | <b>24 (53%)</b>                      | <b>3 (20%)</b>            | <b>5 (16%)</b>                       |
|                                                          | F KO Control             | M KO Control                         | F KO Me                   | M KO Me                              |
| <b>Surface tumors</b>                                    | <b>608</b>               | <b>672</b>                           | <b>662</b>                | <b>627</b>                           |
| Mice per group                                           | <b>11</b>                | <b>12</b>                            | <b>12</b>                 | <b>12</b>                            |
| Avg # tumors per mouse (% WT control)                    | <b>55.3±2.7 (206.6%)</b> | <b>56±3.1 (207.4%)</b>               | <b>55.2±3.1 (206.2%)</b>  | <b>52.3±1.6 (193.5%)</b>             |
| <b>Tumor number size &amp; burden</b>                    |                          |                                      |                           |                                      |
| Avg # tumors/slide (% WT control)                        | <b>6.36±0.5 (215.1%)</b> | <b>6.08±0.5 (297.4%)</b>             | <b>6.5±0.8 (219.7%)</b>   | <b>6.0±0.6 (293.3%)</b>              |
| Avg tumor size (mm <sup>3</sup> )/slide (% WT control)   | <b>0.3±0.1 (144.4%)</b>  | <b>0.67±0.2 (198.8%)</b>             | <b>0.3±0.1 (142.5%)</b>   | <b>0.38±0.2 (113.5%)</b>             |
| Avg tumor burden (mm <sup>3</sup> )/slide (% WT control) | <b>1.91±0.3 (310.6%)</b> | <b>4.05±0.6 (591.4%)* vs. F KO V</b> | <b>1.92±0.3 (313.1%)</b>  | <b>2.28±0.3 (333%)</b>               |
| <b>Tumor histopathology</b>                              |                          |                                      |                           |                                      |
| Total # low grade (% total)                              | <b>30 (21%)</b>          | <b>16 (11%)</b>                      | <b>28 (18%)</b>           | <b>23 (16%)</b>                      |
| Total # medium grade (% total)                           | <b>58 (41%)</b>          | <b>53 (36%)</b>                      | <b>87 (56%)</b>           | <b>52 (36%)</b>                      |
| Total # high grade (% total)                             | <b>52 (37%)</b>          | <b>77 (53%)</b>                      | <b>41 (26%)</b>           | <b>70 (49%)</b>                      |

**Supplemental Table S3: Sex differences within treatment groups of WT and Nrf2 KO A/J mice.** Separation of data shown in Table 1 by sex. Only statistically significant sex-dependent differences are listed. Unpaired T test. \* p < 0.05

|                                                    | WT Control                | WT CDDO-Me 12.5mg/kg         | Nrf2 KO Control                 | Nrf2 KO CDDO-Me 12.5mg/kg           |
|----------------------------------------------------|---------------------------|------------------------------|---------------------------------|-------------------------------------|
| <b>Total surface tumors</b>                        | <b>281</b>                | <b>149</b>                   | <b>252</b>                      | <b>263</b>                          |
| Mice per group                                     | <b>11</b>                 | <b>10</b>                    | <b>5</b>                        | <b>5</b>                            |
| Avg per mouse (% WT Control)                       | <b>25.5 ± 1.8 (100%)</b>  | <b>14.9 ± 0.6 (58.3%) *</b>  | <b>50.4 ± 2.6 (197.3%) ****</b> | <b>52.6 ± 3.1 (205.9%) ****</b>     |
| <b>Tumor #, size, &amp; burden</b>                 |                           |                              |                                 |                                     |
| # of slides/group                                  | <b>22</b>                 | <b>20</b>                    | <b>10</b>                       | <b>10</b>                           |
| Avg # of tumors per slide (% WT control)           | <b>2.6 ± 0.3(100%)</b>    | <b>0.96 ± 0.3 (38%) *</b>    | <b>6.22 ± 0.5 (246.6%) * #</b>  | <b>6.25 ± 0.8 (247.8%) * #</b>      |
| Avg tumor size (mm <sup>3</sup> ) (% WT control)   | <b>0.23 ± 0.07 (100%)</b> | <b>0.1 ± 0.03 (42.3%) *</b>  | <b>0.49 ± 0.17 (207.2%) ##</b>  | <b>0.56 ± 0.21 (236.8%) *** ###</b> |
| Avg tumor burden (mm <sup>3</sup> ) (% WT control) | <b>0.61 ± 0.11 (100%)</b> | <b>0.19 ± 0.04 (30.9%) *</b> | <b>1.2 ± 0.28 (197.4%) * ##</b> | <b>1.8 ± 0.39 (301.1%) ** ##</b>    |
| <b>Tumor histopathology</b>                        |                           |                              |                                 |                                     |
| Total # low grade (% total)                        | <b>6 (10.5%)</b>          | <b>8 (21.6%)</b>             | <b>5 (18.5%)</b>                | <b>2 (6.1%)</b>                     |
| Total # med grade (% total)                        | <b>27 (47.4%)</b>         | <b>21 (56.8%)</b>            | <b>10 (37%)</b>                 | <b>13 (39.4%)</b>                   |
| Total # high grade (% total)                       | <b>26 (45.6%)</b>         | <b>12 (32.4%)</b>            | <b>12 (44.4%)</b>               | <b>18 (54.5%)</b>                   |

**Supplemental Table S4: Tumor numbers, sizes, burden, and histopathology of WT and Nrf2 KO A/J mice treated with vehicle or 12.5 mg/kg CDDO-Me.** Tumors were initiated as described and mice treated with 12.5mg/kg CDDO-Me. Two-way ANOVA followed by Tukey HSD for multiple comparisons of tumor number, size, and burden; z-test for proportions of histopathological grades. \* p < 0.05 vs. WT control; \*\* p < 0.01 vs. WT control; \*\*\* p < 0.001 vs. WT control; \*\*\*\* p < 0.0001 vs. WT control; # p < 0.05 vs. WT CDDO-Me 12.5 mg/kg; ## p < 0.01 vs. WT CDDO-Me 12.5mg/kg; ### p < 0.001 vs. WT CDDO-Me 12.5mg/kg.

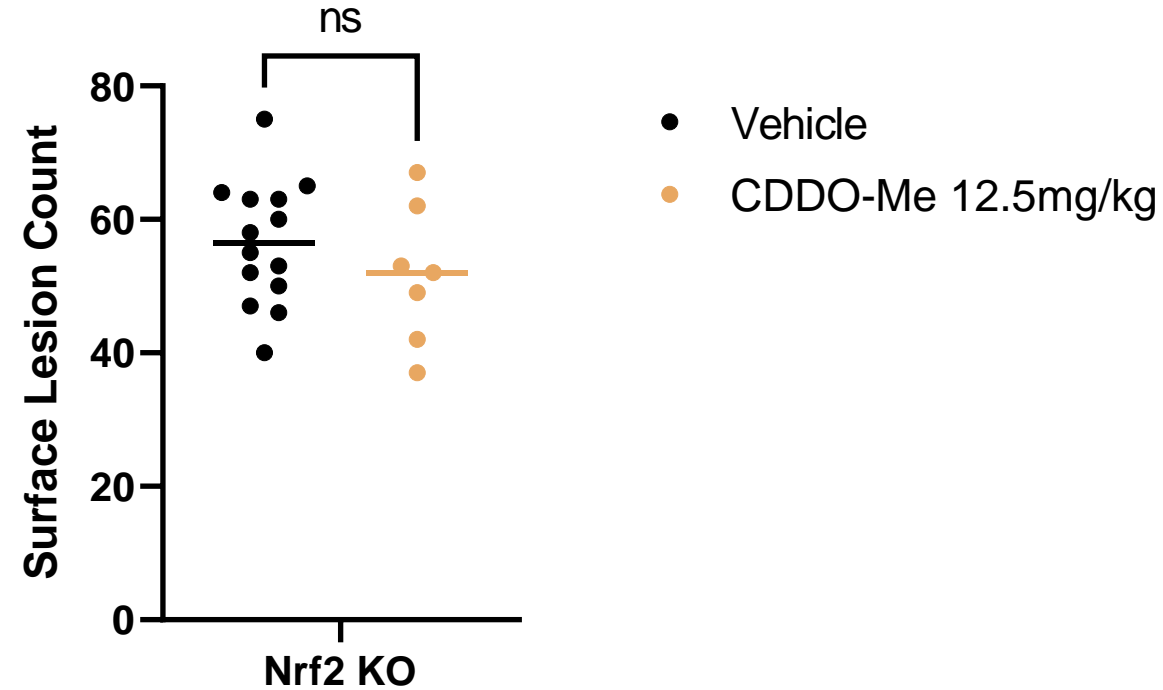

**Supplemental Figure S4: A low dose of CDDO-Me does not change surface tumor counts in A/J Nrf2 KO mice.** Surface tumor quantification of Nrf2 KO mice treated with vehicle control or CDDO-Me (12.5 mg/kg). Unpaired T test. ns = not significant.



**A**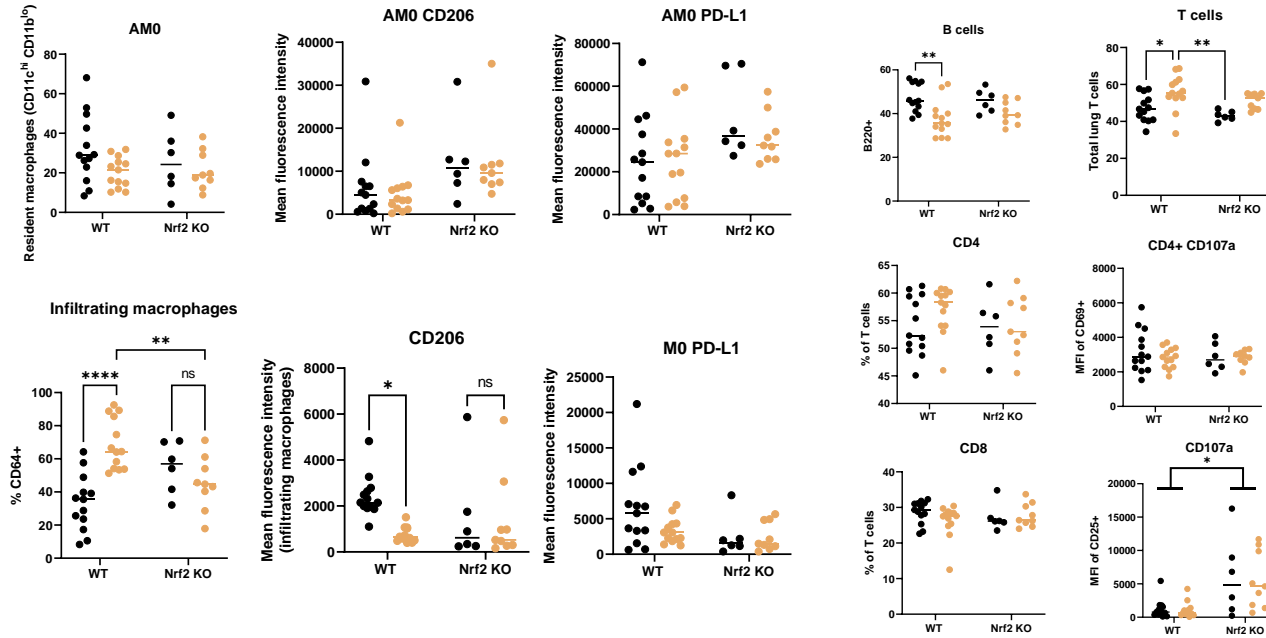

● Vehicle  
● CDDO-Me 50mg/kg

**B**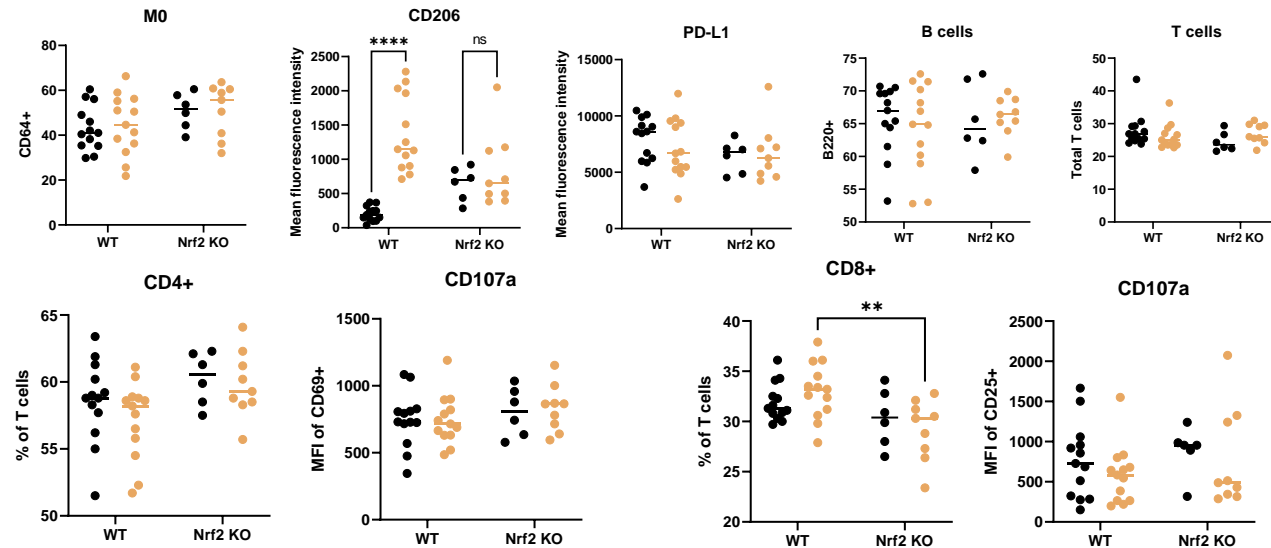

**Supplemental Figure S5: Immune cell populations in the lungs (A) and spleens (B) of female A/J mice.** Female A/J WT and Nrf2 KO mice were challenged with vinyl carbamate and fed CDDO-Me in diet for 16 weeks. Immune cell populations were analyzed by flow cytometry. 2-way ANOVA followed by Tukey HSD. ns = not significant; \*  $p < 0.05$ ; \*\*  $p < 0.01$ ; \*\*\*  $p < 0.001$ ; \*\*\*\*  $p < 0.0001$

**A**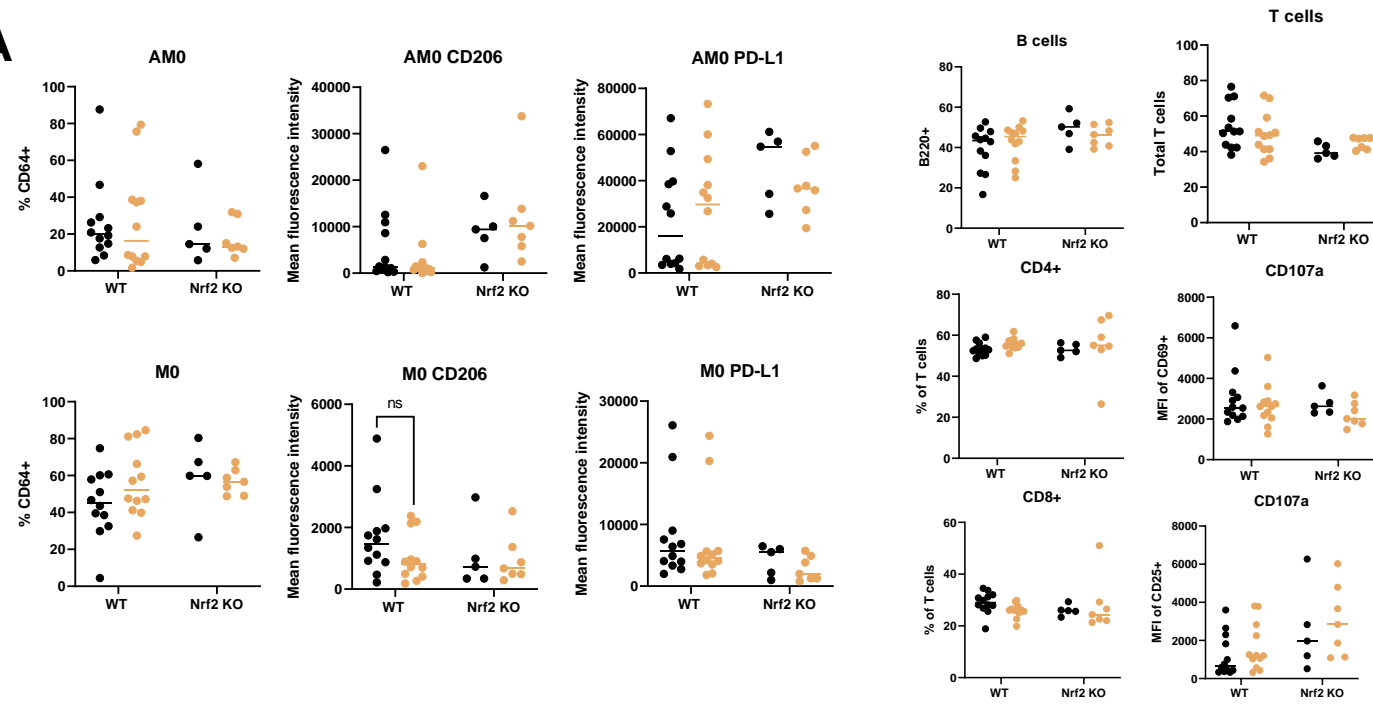**B**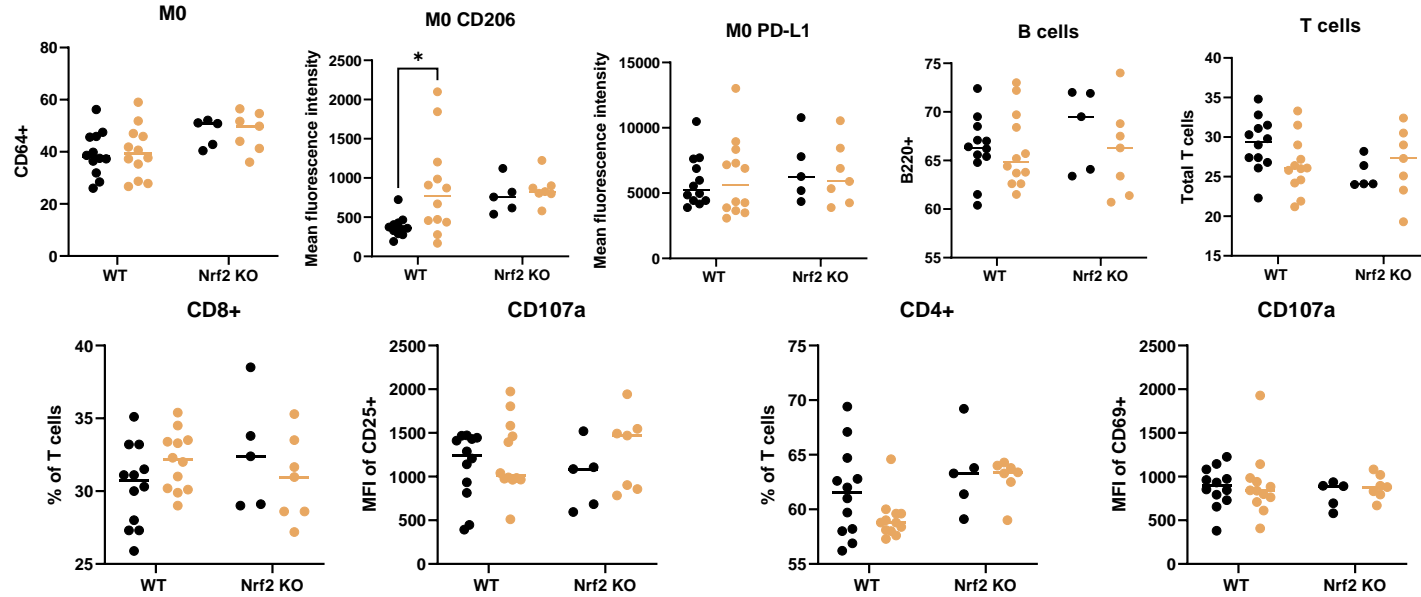

● Vehicle  
● CDDO-Me 50mg/kg

**Supplemental Figure S6: Immune cell populations in the lungs (A) and spleens (B) of male A/J mice.** Male A/J WT and Nrf2 KO mice were challenged with vinyl carbamate and fed CDDO-Me in diet for 16 weeks. Immune cell populations were analyzed by flow cytometry. 2-way ANOVA followed by Tukey HSD. ns = not significant; \*  $p < 0.05$

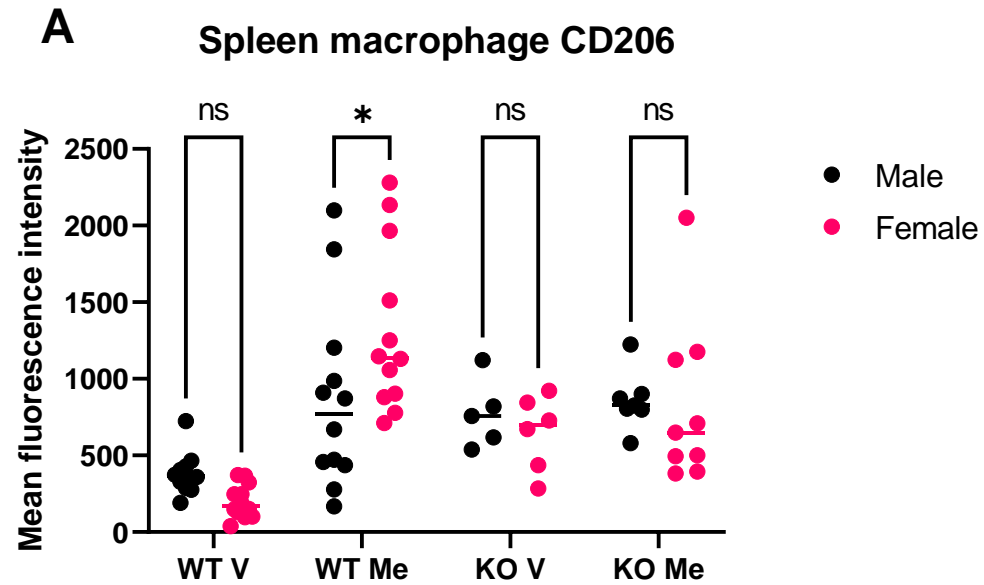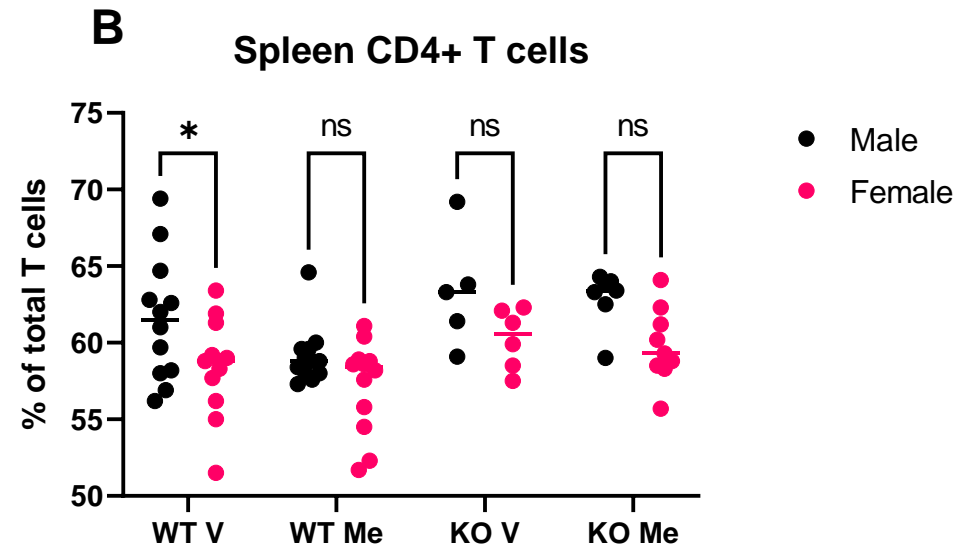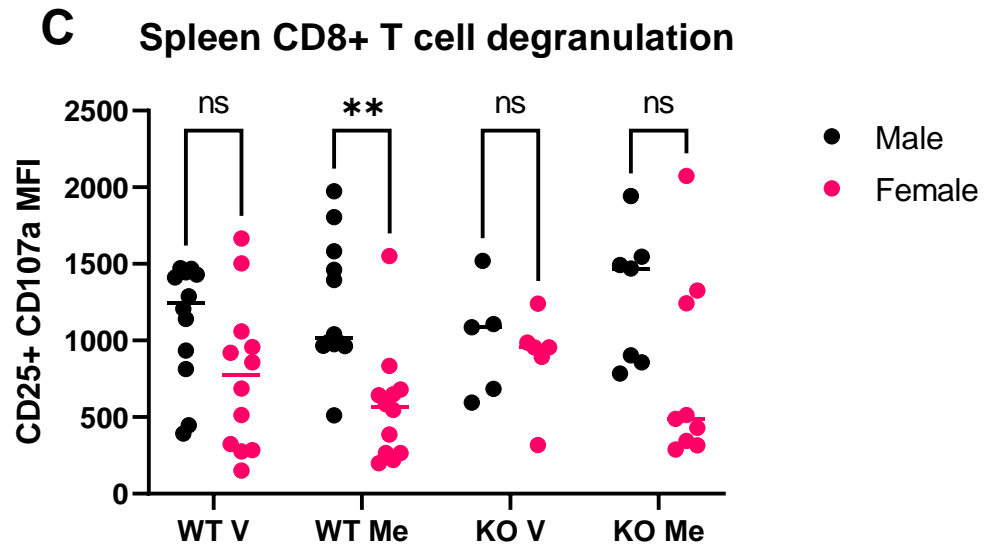

**Supplemental Figure S7: Sex differences in immune cell populations in A/J mice.** A/J WT and Nrf2 KO mice were challenged with vinyl carbamate and fed CDDO-Me in diet for 16 weeks. Immune cell populations were analyzed by flow cytometry. **(A)** CD206 MFI on spleen macrophages. **(B)** Total CD4+ T cells in the spleen. **(C)** CD107a MFI on CD25+ cytotoxic (CD8+) T cells in the spleen. 2-way ANOVA followed by Tukey HSD. ns = not significant; \*  $p < 0.05$ ; \*\*  $p < 0.01$
